# Supplementary material for: Molecular Dynamics Simulation on Structure and Dielectric Permittivity of BaTiO3/PVDF Composites
Source: Hindawi journal article supplement (doi:10.1155/2021/9019580), 2021-09-22
Supplement: f1 [file 9019580.f1.docx]

**Supplementary figure 1.** Temperature and energy distribution during the final NPT-MD simulation of the BT10/PVDF(e)(f) and BT15/PVDF(g)(h) hybrid system

(e)

(f)

(g)

(h)
