# Supplementary material for: Molecular Dynamics Simulation on Structure and Dielectric Permittivity of BaTiO3/PVDF Composites
Source: Hindawi journal article supplement (doi:10.1155/2021/9019580), 2021-09-22
Supplement: f2 [file 9019580.f2.pdf]

## PVDF

| Temperature(K) | Volume( $\text{\AA}^3$ ) | Density( $\text{g/cm}^3$ ) | Specific volume( $\text{cm}^3/\text{g}$ ) |
|----------------|--------------------------|----------------------------|-------------------------------------------|
| 150            | 20366.481                | 1.567                      | 0.638                                     |
| 190            | 20472.428                | 1.558                      | 0.642                                     |
| 230            | 20598.826                | 1.548                      | 0.646                                     |
| 270            | 20768.004                | 1.534                      | 0.652                                     |
| 310            | 20868.944                | 1.522                      | 0.657                                     |
| 350            | 21007.179                | 1.514                      | 0.661                                     |
| 390            | 21313.904                | 1.491                      | 0.671                                     |
| 430            | 21113.182                | 1.511                      | 0.662                                     |
| 470            | 21691.215                | 1.46                       | 0.685                                     |
| 510            | 22208.378                | 1.433                      | 0.699                                     |
| 550            | 24072.157                | 1.402                      | 0.713                                     |

## BT10/PVDF

| Temperature(K) | Volume(Å <sup>3</sup> ) | Density(g/cm <sup>3</sup> ) | Specific volume(cm <sup>3</sup> /g) |
|----------------|-------------------------|-----------------------------|-------------------------------------|
| 150            | 23754.84                | 1.896                       | 0.527                               |
| 190            | 23974.5                 | 1.875                       | 0.533                               |
| 230            | 24146.715               | 1.86                        | 0.538                               |
| 270            | 24389.403               | 1.842                       | 0.543                               |
| 310            | 24507.358               | 1.833                       | 0.546                               |
| 350            | 24648.543               | 1.824                       | 0.548                               |
| 390            | 24892.923               | 1.801                       | 0.555                               |
| 430            | 25100.348               | 1.788                       | 0.559                               |
| 470            | 25768.048               | 1.749                       | 0.572                               |
| 510            | 26296.404               | 1.701                       | 0.588                               |
| 550            | 31605.294               | 1.631                       | 0.613                               |

## BT15/PVDF

| Temperature(K) | Volume(Å <sup>3</sup> ) | Density(g/cm <sup>3</sup> ) | Specific volume(cm <sup>3</sup> /g) |
|----------------|-------------------------|-----------------------------|-------------------------------------|
| 150            | 24960.885               | 1.976                       | 0.506                               |
| 190            | 25119.372               | 1.963                       | 0.509                               |
| 230            | 25329.292               | 1.946                       | 0.514                               |
| 270            | 25483.573               | 1.935                       | 0.517                               |
| 310            | 25684.085               | 1.917                       | 0.522                               |
| 350            | 25868.088               | 1.91                        | 0.524                               |
| 390            | 26025.861               | 1.894                       | 0.528                               |
| 430            | 26441.069               | 1.874                       | 0.534                               |
| 470            | 27034.376               | 1.833                       | 0.546                               |
| 510            | 27882.775               | 1.787                       | 0.56                                |
| 550            | 31340.754               | 1.709                       | 0.585                               |

## BT20/PVDF

| Temperature(K) | Volume(Å <sup>3</sup> ) | Density(g/cm <sup>3</sup> ) | Specific volume(cm <sup>3</sup> /g) |
|----------------|-------------------------|-----------------------------|-------------------------------------|
| 150            | 27102.11                | 2.14                        | 0.467                               |
| 190            | 27268.216               | 2.12                        | 0.47                                |
| 230            | 27495.377               | 2.111                       | 0.474                               |
| 270            | 27696.229               | 2.093                       | 0.478                               |
| 310            | 27830.828               | 2.083                       | 0.48                                |
| 350            | 28060.541               | 2.069                       | 0.483                               |
| 390            | 28651.152               | 2.042                       | 0.49                                |
| 430            | 29355.552               | 1.987                       | 0.503                               |
| 470            | 30037.901               | 1.931                       | 0.518                               |
| 510            | 30486.957               | 1.88                        | 0.532                               |
| 550            | 33780.642               | 1.793                       | 0.558                               |
