# Supplementary material for: Molecular Dynamics Simulation on Structure and Dielectric Permittivity of BaTiO3/PVDF Composites
Source: Hindawi journal article supplement (doi:10.1155/2021/9019580), 2021-09-22
Supplement: f3 [file 9019580.f3.pdf]

## PVDF

| Freq. [Hz] | $\epsilon'$ | $\epsilon''$ | Tan(Delta) |
|------------|-------------|--------------|------------|
| 1.00E+07   | 4.60E+00    | 1.02E+00     | 2.22E-01   |
| 7.14E+06   | 4.84E+00    | 1.12E+00     | 2.32E-01   |
| 5.10E+06   | 5.11E+00    | 1.23E+00     | 2.41E-01   |
| 3.64E+06   | 5.42E+00    | 1.30E+00     | 2.41E-01   |
| 2.60E+06   | 5.73E+00    | 1.37E+00     | 2.40E-01   |
| 1.86E+06   | 6.07E+00    | 1.42E+00     | 2.34E-01   |
| 1.33E+06   | 6.42E+00    | 1.44E+00     | 2.25E-01   |
| 9.49E+05   | 6.77E+00    | 1.42E+00     | 2.09E-01   |
| 6.78E+05   | 7.11E+00    | 1.35E+00     | 1.90E-01   |
| 4.84E+05   | 7.43E+00    | 1.25E+00     | 1.69E-01   |
| 3.46E+05   | 7.72E+00    | 1.13E+00     | 1.47E-01   |
| 2.47E+05   | 7.96E+00    | 1.00E+00     | 1.26E-01   |
| 1.76E+05   | 8.16E+00    | 8.65E-01     | 1.06E-01   |
| 1.26E+05   | 8.32E+00    | 7.33E-01     | 8.81E-02   |
| 9.00E+04   | 8.45E+00    | 6.13E-01     | 7.25E-02   |
| 6.43E+04   | 8.55E+00    | 5.08E-01     | 5.94E-02   |
| 4.59E+04   | 8.63E+00    | 4.19E-01     | 4.85E-02   |
| 3.28E+04   | 8.69E+00    | 3.45E-01     | 3.98E-02   |
| 2.34E+04   | 8.73E+00    | 2.87E-01     | 3.28E-02   |
| 1.67E+04   | 8.77E+00    | 2.41E-01     | 2.74E-02   |
| 1.20E+04   | 8.80E+00    | 2.05E-01     | 2.33E-02   |
| 8.54E+03   | 8.83E+00    | 1.79E-01     | 2.02E-02   |
| 6.10E+03   | 8.86E+00    | 1.60E-01     | 1.80E-02   |
| 4.36E+03   | 8.89E+00    | 1.46E-01     | 1.64E-02   |
| 3.11E+03   | 8.91E+00    | 1.38E-01     | 1.54E-02   |
| 2.22E+03   | 8.93E+00    | 1.33E-01     | 1.49E-02   |
| 1.59E+03   | 8.95E+00    | 1.32E-01     | 1.48E-02   |
| 1.13E+03   | 8.98E+00    | 1.35E-01     | 1.50E-02   |
| 8.10E+02   | 9.00E+00    | 1.41E-01     | 1.56E-02   |
| 5.78E+02   | 9.03E+00    | 1.50E-01     | 1.66E-02   |
| 4.13E+02   | 9.05E+00    | 1.63E-01     | 1.79E-02   |
| 2.95E+02   | 9.08E+00    | 1.79E-01     | 1.97E-02   |
| 2.11E+02   | 9.12E+00    | 2.00E-01     | 2.20E-02   |
| 1.51E+02   | 9.15E+00    | 2.27E-01     | 2.48E-02   |
| 1.08E+02   | 9.20E+00    | 2.59E-01     | 2.82E-02   |
| 7.68E+01   | 9.24E+00    | 2.97E-01     | 3.22E-02   |
| 5.49E+01   | 9.30E+00    | 3.44E-01     | 3.70E-02   |
| 3.92E+01   | 9.37E+00    | 3.97E-01     | 4.24E-02   |
| 2.80E+01   | 9.45E+00    | 4.60E-01     | 4.87E-02   |
| 2.00E+01   | 9.54E+00    | 5.30E-01     | 5.56E-02   |
| 1.43E+01   | 9.65E+00    | 6.09E-01     | 6.31E-02   |
| 1.02E+01   | 9.78E+00    | 6.96E-01     | 7.12E-02   |
| 7.29E+00   | 9.93E+00    | 7.88E-01     | 7.94E-02   |
| 5.21E+00   | 1.01E+01    | 8.84E-01     | 8.74E-02   |
| 3.72E+00   | 1.03E+01    | 9.80E-01     | 9.50E-02   |
| 2.66E+00   | 1.06E+01    | 1.07E+00     | 1.02E-01   |
| 1.90E+00   | 1.08E+01    | 1.16E+00     | 1.07E-01   |
| 1.36E+00   | 1.11E+01    | 1.22E+00     | 1.11E-01   |
| 1.00E+00   | 1.13E+01    | 1.28E+00     | 1.13E-01   |

## BT10PVDF

| Freq. [Hz] | $\epsilon'$ | $\epsilon''$ | Tan(Delta) |
|------------|-------------|--------------|------------|
| 1.00E+07   | 7.85E+00    | 1.48E+00     | 1.89E-01   |
| 7.14E+06   | 8.21E+00    | 1.62E+00     | 1.97E-01   |
| 5.10E+06   | 8.60E+00    | 1.76E+00     | 2.04E-01   |
| 3.64E+06   | 9.04E+00    | 1.83E+00     | 2.02E-01   |
| 2.60E+06   | 9.49E+00    | 1.91E+00     | 2.02E-01   |
| 1.86E+06   | 9.96E+00    | 1.96E+00     | 1.97E-01   |
| 1.33E+06   | 1.04E+01    | 1.97E+00     | 1.89E-01   |
| 9.49E+05   | 1.09E+01    | 1.92E+00     | 1.76E-01   |
| 6.78E+05   | 1.14E+01    | 1.81E+00     | 1.59E-01   |
| 4.84E+05   | 1.18E+01    | 1.67E+00     | 1.41E-01   |
| 3.46E+05   | 1.22E+01    | 1.50E+00     | 1.23E-01   |
| 2.47E+05   | 1.25E+01    | 1.32E+00     | 1.06E-01   |
| 1.76E+05   | 1.27E+01    | 1.14E+00     | 8.92E-02   |
| 1.26E+05   | 1.29E+01    | 9.65E-01     | 7.46E-02   |
| 9.00E+04   | 1.31E+01    | 8.11E-01     | 6.19E-02   |
| 6.43E+04   | 1.32E+01    | 6.78E-01     | 5.12E-02   |
| 4.59E+04   | 1.33E+01    | 5.67E-01     | 4.25E-02   |
| 3.28E+04   | 1.34E+01    | 4.76E-01     | 3.55E-02   |
| 2.34E+04   | 1.35E+01    | 4.06E-01     | 3.01E-02   |
| 1.67E+04   | 1.35E+01    | 3.52E-01     | 2.60E-02   |
| 1.20E+04   | 1.36E+01    | 3.12E-01     | 2.30E-02   |
| 8.54E+03   | 1.36E+01    | 2.85E-01     | 2.09E-02   |
| 6.10E+03   | 1.37E+01    | 2.67E-01     | 1.95E-02   |
| 4.36E+03   | 1.37E+01    | 2.57E-01     | 1.88E-02   |
| 3.11E+03   | 1.38E+01    | 2.55E-01     | 1.85E-02   |
| 2.22E+03   | 1.38E+01    | 2.58E-01     | 1.87E-02   |
| 1.59E+03   | 1.39E+01    | 2.67E-01     | 1.92E-02   |
| 1.13E+03   | 1.39E+01    | 2.80E-01     | 2.01E-02   |
| 8.10E+02   | 1.40E+01    | 2.98E-01     | 2.14E-02   |
| 5.78E+02   | 1.40E+01    | 3.21E-01     | 2.29E-02   |
| 4.13E+02   | 1.41E+01    | 3.48E-01     | 2.47E-02   |
| 2.95E+02   | 1.41E+01    | 3.82E-01     | 2.70E-02   |
| 2.11E+02   | 1.42E+01    | 4.21E-01     | 2.96E-02   |
| 1.51E+02   | 1.43E+01    | 4.68E-01     | 3.27E-02   |
| 1.08E+02   | 1.44E+01    | 5.25E-01     | 3.65E-02   |
| 7.68E+01   | 1.45E+01    | 5.93E-01     | 4.09E-02   |
| 5.49E+01   | 1.46E+01    | 6.71E-01     | 4.59E-02   |
| 3.92E+01   | 1.47E+01    | 7.64E-01     | 5.18E-02   |
| 2.80E+01   | 1.49E+01    | 8.69E-01     | 5.83E-02   |
| 2.00E+01   | 1.51E+01    | 9.89E-01     | 6.56E-02   |
| 1.43E+01   | 1.53E+01    | 1.12E+00     | 7.35E-02   |
| 1.02E+01   | 1.55E+01    | 1.27E+00     | 8.19E-02   |
| 7.29E+00   | 1.58E+01    | 1.43E+00     | 9.03E-02   |
| 5.21E+00   | 1.61E+01    | 1.60E+00     | 9.90E-02   |
| 3.72E+00   | 1.65E+01    | 1.76E+00     | 1.07E-01   |
| 2.66E+00   | 1.69E+01    | 1.93E+00     | 1.14E-01   |
| 1.90E+00   | 1.73E+01    | 2.09E+00     | 1.20E-01   |
| 1.36E+00   | 1.78E+01    | 2.22E+00     | 1.24E-01   |
| 1.00E+00   | 1.83E+01    | 2.34E+00     | 1.28E-01   |

## BT15PVDF

| Freq. [Hz] | $\epsilon'$ | $\epsilon''$ | Tan(Delta) |
|------------|-------------|--------------|------------|
| 1.00E+07   | 1.03E+01    | 1.82E+00     | 1.77E-01   |
| 7.14E+06   | 1.07E+01    | 1.98E+00     | 1.85E-01   |
| 5.10E+06   | 1.12E+01    | 2.15E+00     | 1.92E-01   |
| 3.64E+06   | 1.17E+01    | 2.24E+00     | 1.91E-01   |
| 2.60E+06   | 1.23E+01    | 2.33E+00     | 1.90E-01   |
| 1.86E+06   | 1.29E+01    | 2.39E+00     | 1.86E-01   |
| 1.33E+06   | 1.34E+01    | 2.41E+00     | 1.79E-01   |
| 9.49E+05   | 1.40E+01    | 2.34E+00     | 1.67E-01   |
| 6.78E+05   | 1.46E+01    | 2.21E+00     | 1.52E-01   |
| 4.84E+05   | 1.51E+01    | 2.04E+00     | 1.36E-01   |
| 3.46E+05   | 1.55E+01    | 1.84E+00     | 1.19E-01   |
| 2.47E+05   | 1.59E+01    | 1.63E+00     | 1.02E-01   |
| 1.76E+05   | 1.62E+01    | 1.41E+00     | 8.68E-02   |
| 1.26E+05   | 1.65E+01    | 1.20E+00     | 7.28E-02   |
| 9.00E+04   | 1.67E+01    | 1.01E+00     | 6.06E-02   |
| 6.43E+04   | 1.69E+01    | 8.50E-01     | 5.04E-02   |
| 4.59E+04   | 1.70E+01    | 7.13E-01     | 4.19E-02   |
| 3.28E+04   | 1.71E+01    | 6.01E-01     | 3.51E-02   |
| 2.34E+04   | 1.72E+01    | 5.14E-01     | 2.99E-02   |
| 1.67E+04   | 1.73E+01    | 4.47E-01     | 2.59E-02   |
| 1.20E+04   | 1.73E+01    | 3.97E-01     | 2.29E-02   |
| 8.54E+03   | 1.74E+01    | 3.63E-01     | 2.09E-02   |
| 6.10E+03   | 1.75E+01    | 3.41E-01     | 1.95E-02   |
| 4.36E+03   | 1.75E+01    | 3.29E-01     | 1.88E-02   |
| 3.11E+03   | 1.76E+01    | 3.27E-01     | 1.86E-02   |
| 2.22E+03   | 1.76E+01    | 3.32E-01     | 1.89E-02   |
| 1.59E+03   | 1.77E+01    | 3.44E-01     | 1.95E-02   |
| 1.13E+03   | 1.78E+01    | 3.62E-01     | 2.04E-02   |
| 8.10E+02   | 1.78E+01    | 3.86E-01     | 2.16E-02   |
| 5.78E+02   | 1.79E+01    | 4.15E-01     | 2.32E-02   |
| 4.13E+02   | 1.80E+01    | 4.49E-01     | 2.50E-02   |
| 2.95E+02   | 1.81E+01    | 4.91E-01     | 2.71E-02   |
| 2.11E+02   | 1.82E+01    | 5.40E-01     | 2.97E-02   |
| 1.51E+02   | 1.83E+01    | 5.98E-01     | 3.27E-02   |
| 1.08E+02   | 1.84E+01    | 6.69E-01     | 3.64E-02   |
| 7.68E+01   | 1.85E+01    | 7.52E-01     | 4.06E-02   |
| 5.49E+01   | 1.87E+01    | 8.50E-01     | 4.55E-02   |
| 3.92E+01   | 1.88E+01    | 9.66E-01     | 5.13E-02   |
| 2.80E+01   | 1.90E+01    | 1.10E+00     | 5.77E-02   |
| 2.00E+01   | 1.93E+01    | 1.25E+00     | 6.48E-02   |
| 1.43E+01   | 1.95E+01    | 1.42E+00     | 7.25E-02   |
| 1.02E+01   | 1.98E+01    | 1.60E+00     | 8.06E-02   |
| 7.29E+00   | 2.02E+01    | 1.79E+00     | 8.88E-02   |
| 5.21E+00   | 2.06E+01    | 2.00E+00     | 9.70E-02   |
| 3.72E+00   | 2.10E+01    | 2.20E+00     | 1.05E-01   |
| 2.66E+00   | 2.15E+01    | 2.42E+00     | 1.13E-01   |

1.90E+00 2.21E+01 2.60E+00 1.18E-01  
1.36E+00 2.26E+01 2.78E+00 1.23E-01  
1.00E+00 2.33E+01 2.90E+00 1.25E-01

## BT20/PVDF

| Freq. [Hz] | $\epsilon'$ | $\epsilon''$ | Tan(Delta) |
|------------|-------------|--------------|------------|
| 1.00E+07   | 1.11E+01    | 2.03E+00     | 1.82E-01   |
| 7.14E+06   | 1.16E+01    | 2.20E+00     | 1.89E-01   |
| 5.10E+06   | 1.22E+01    | 2.38E+00     | 1.96E-01   |
| 3.64E+06   | 1.28E+01    | 2.48E+00     | 1.94E-01   |
| 2.60E+06   | 1.34E+01    | 2.58E+00     | 1.93E-01   |
| 1.86E+06   | 1.40E+01    | 2.63E+00     | 1.88E-01   |
| 1.33E+06   | 1.46E+01    | 2.60E+00     | 1.78E-01   |
| 9.49E+05   | 1.52E+01    | 2.55E+00     | 1.67E-01   |
| 6.78E+05   | 1.59E+01    | 2.42E+00     | 1.52E-01   |
| 4.84E+05   | 1.64E+01    | 2.23E+00     | 1.36E-01   |
| 3.46E+05   | 1.69E+01    | 2.01E+00     | 1.19E-01   |
| 2.47E+05   | 1.73E+01    | 1.78E+00     | 1.02E-01   |
| 1.76E+05   | 1.77E+01    | 1.54E+00     | 8.70E-02   |
| 1.26E+05   | 1.80E+01    | 1.31E+00     | 7.31E-02   |
| 9.00E+04   | 1.82E+01    | 1.11E+00     | 6.10E-02   |
| 6.43E+04   | 1.84E+01    | 9.35E-01     | 5.09E-02   |
| 4.59E+04   | 1.85E+01    | 7.89E-01     | 4.26E-02   |
| 3.28E+04   | 1.86E+01    | 6.69E-01     | 3.59E-02   |
| 2.34E+04   | 1.87E+01    | 5.75E-01     | 3.07E-02   |
| 1.67E+04   | 1.88E+01    | 5.03E-01     | 2.67E-02   |
| 1.20E+04   | 1.89E+01    | 4.51E-01     | 2.38E-02   |
| 8.54E+03   | 1.90E+01    | 4.14E-01     | 2.18E-02   |
| 6.10E+03   | 1.90E+01    | 3.92E-01     | 2.06E-02   |
| 4.36E+03   | 1.91E+01    | 3.80E-01     | 1.99E-02   |
| 3.11E+03   | 1.92E+01    | 3.79E-01     | 1.98E-02   |
| 2.22E+03   | 1.92E+01    | 3.85E-01     | 2.00E-02   |
| 1.59E+03   | 1.93E+01    | 3.99E-01     | 2.07E-02   |
| 1.13E+03   | 1.94E+01    | 4.19E-01     | 2.16E-02   |
| 8.10E+02   | 1.95E+01    | 4.45E-01     | 2.29E-02   |
| 5.78E+02   | 1.95E+01    | 4.76E-01     | 2.44E-02   |
| 4.13E+02   | 1.96E+01    | 5.14E-01     | 2.62E-02   |
| 2.95E+02   | 1.97E+01    | 5.58E-01     | 2.83E-02   |
| 2.11E+02   | 1.99E+01    | 6.11E-01     | 3.08E-02   |
| 1.51E+02   | 2.00E+01    | 6.70E-01     | 3.36E-02   |
| 1.08E+02   | 2.01E+01    | 7.47E-01     | 3.72E-02   |
| 7.68E+01   | 2.03E+01    | 8.35E-01     | 4.13E-02   |
| 5.49E+01   | 2.04E+01    | 9.39E-01     | 4.60E-02   |
| 3.92E+01   | 2.06E+01    | 1.06E+00     | 5.14E-02   |
| 2.80E+01   | 2.08E+01    | 1.19E+00     | 5.74E-02   |
| 2.00E+01   | 2.11E+01    | 1.35E+00     | 6.39E-02   |
| 1.43E+01   | 2.14E+01    | 1.52E+00     | 7.11E-02   |
| 1.02E+01   | 2.17E+01    | 1.70E+00     | 7.84E-02   |
| 7.29E+00   | 2.21E+01    | 1.89E+00     | 8.59E-02   |
| 5.21E+00   | 2.25E+01    | 2.09E+00     | 9.29E-02   |
| 3.72E+00   | 2.30E+01    | 2.29E+00     | 9.98E-02   |
| 2.66E+00   | 2.35E+01    | 2.51E+00     | 1.07E-01   |

1.90E+00 2.41E+01 2.66E+00 1.11E-01  
1.36E+00 2.47E+01 2.82E+00 1.14E-01  
1.00E+00 2.53E+01 2.95E+00 1.17E-01
